# Supplementary material
Source: PubMed Central journal article supplement (PMC3299486)
Supplement: NIHMS358866-supplement-Supp_Fig_S1-S3___Table_S1-S3.pdf [file NIHMS358866-supplement-Supp_Fig_S1-S3___Table_S1-S3.pdf]

*Supporting Information*  
*to*  
Validating the Vitality Strategy for Fighting Drug Resistance

Nidhi Singh,<sup>1,2</sup> Maria Frushicheva<sup>1</sup> and Arie Warshel<sup>1,\*</sup>

(1) Department of Chemistry, 418 SGM Building, University of Southern California,  
3620 McClintock Avenue, Los Angeles, California 90089-1062, USA

(2) Transtech Pharma, Inc., 4170 Mendenhall Oaks Parkway, High Point, North Carolina 26275, USA

\*Corresponding Author. Tel.: +1-213-740-4114; Fax: +1-213-740-2701; e-mail:[warshel@usc.edu](mailto:warshel@usc.edu)

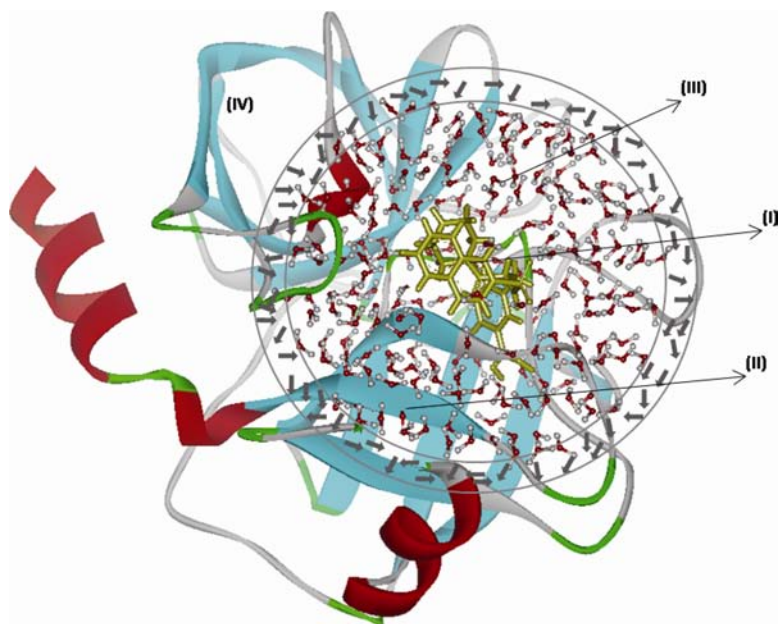

**Figure S1.** Using a complex of trypsin (flat ribbon) and an inhibitor (stick) to illustrate the construction of the explicit SCAAS simulation system. The enzyme substrate complex is solvated by a water sphere (ball and stick). The figure illustrates the typical boundary conditions in the PDL/D/S-LRA/ $\beta$  calculations. In such calculations we confine to Region I the “inhibitor” or the group whose electrostatic energy is of interest, Region II includes all the protein residues within 18 Å cutoff radius from the center of Region I and Region III includes the explicit water molecules in and around regions I and II and is completed by a 2Å surface water region, which is subjected to polarization and radial constraints. This region is surrounded by bulk solvent (Region IV) with a high dielectric constant ( $\epsilon = 80$ ). The electrostatic effects of regions I, II, and III are treated explicitly whereas those of Region IV are treated by a macroscopic continuum formulation.

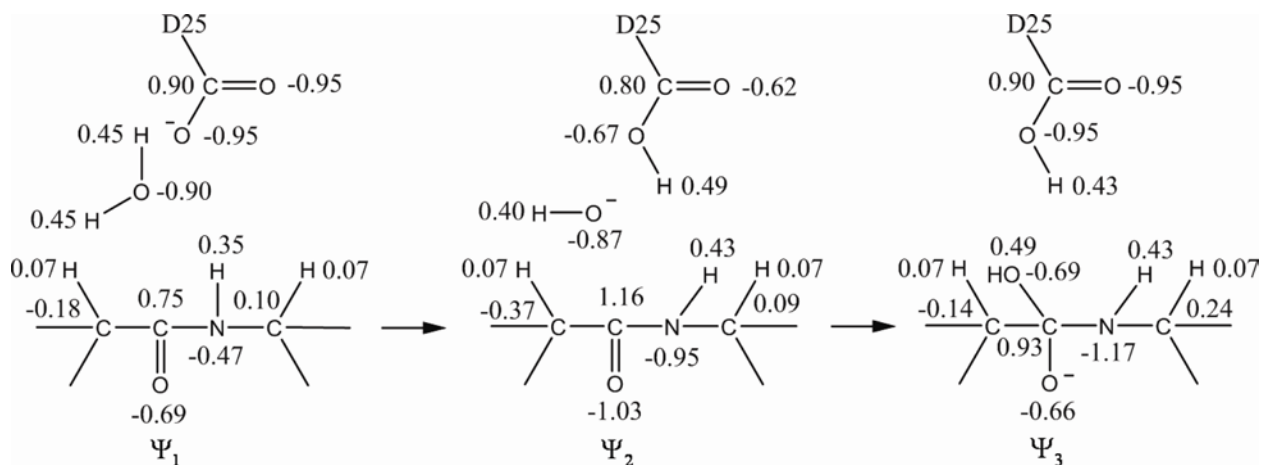

**Figure S2.** The *ab initio* charges used in EVB calculations.  $\Psi_1$ ,  $\Psi_2$  and  $\Psi_3$  designates the reactant state (RS), the TS1 and the intermediate (Int) respectively (see Figure 1 in the main text).

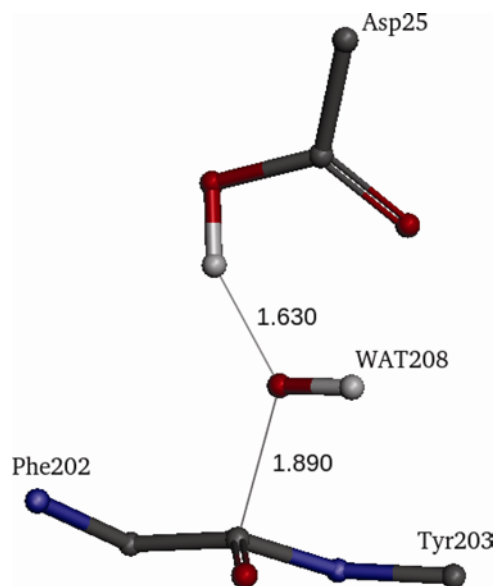

**Figure S3.** Illustrating the calculated geometry of TS1'. The depicted geometry is a snapshot from a EVB trajectory at the TS of the rate limiting step of the attack by an hydroxide ion on

the carbonyl carbon of the peptide bond, during the formation of the oxyanion tetrahedral intermediate (the reaction step involved in moving from *TS1* to *Int*, see Figure 1 in the main text).

**Table SI.** Parameters used in the EVB calculations\*.

Morse bond parameters:  $\Delta M(b) = D_M \left(1 - e^{-\mu(b-b_0)}\right)^2$

| Bond type                                      | $D_M$ | $b_0$ | $\mu$ |
|------------------------------------------------|-------|-------|-------|
| N-H <sub>N</sub>                               | 98.0  | 1.10  | 2.0   |
| C-O ( $\psi_1, \psi_2$ )                       | 93.0  | 1.43  | 2.0   |
| C-O ( $\psi_3$ )                               | 93.0  | 1.50  | 2.0   |
| C <sub>A</sub> -H <sub>A</sub>                 | 102.0 | 1.00  | 2.0   |
| N-C <sub>A</sub>                               | 94.0  | 1.40  | 2.0   |
| N-C ( $\psi_1, \psi_2$ )                       | 92.0  | 1.47  | 2.0   |
| N-C ( $\psi_3$ )                               | 94.0  | 1.40  | 2.0   |
| C-C <sub>A</sub> ( $\psi_1, \psi_2$ )          | 96.0  | 1.54  | 2.0   |
| C-C <sub>A</sub> ( $\psi_3$ )                  | 96.0  | 1.54  | 2.0   |
| O <sub>H</sub> -H <sub>i=1,2</sub> (water)     | 102.0 | 0.98  | 2.0   |
| C <sub>G</sub> -O <sub>D1,D2</sub> (aspartate) | 93.0  | 1.43  | 2.0   |

Angle parameters:  $V_\theta(\theta) = 1/2 k_\theta (\theta - \theta_0)^2$

| Angle type                                       | $1/2 k_\theta$ | $\theta_0$ |
|--------------------------------------------------|----------------|------------|
| O <sub>D1</sub> -C <sub>G</sub> -O <sub>D2</sub> | 50.0           | 120.0      |
| H <sub>1</sub> -O <sub>H</sub> -H <sub>2</sub>   | 80.0           | 109.5      |
| C-N <sub>1</sub> -C <sub>A</sub>                 | 50.0           | 120.0      |
| N-C <sub>A</sub> -H <sub>A</sub>                 | 50.0           | 109.5      |
| O-C-N                                            | 50.0           | 120.0      |

Torsion angle parameters:  $V_\phi(\phi) = k_\phi (1 + \cos(n\phi - \phi_0))$

| Angle type                                         | $k_\phi$ | $n$ | $\phi_0$ |
|----------------------------------------------------|----------|-----|----------|
| H-C <sub>A</sub> -C-O                              | 2.0      | 3.0 | 0.0      |
| C <sub>A</sub> -C-N-C <sub>A</sub>                 | 15.0     | 2.0 | 180.0    |
| H-O <sub>D1</sub> -C <sub>G</sub> -O <sub>D2</sub> | 15.0     | 2.0 | 180.0    |
| C-N-C <sub>A</sub> -H <sub>A</sub>                 | 2.0      | 3.0 | 0.0      |
| H-O <sub>H</sub> -C-O                              | 2.0      | 3.0 | 0.0      |

Improper torsion angle parameters:  $V_\phi(\phi) = k_\phi(1 + \cos(n\phi - \phi_0))$

| Angle type                          | $k_\phi$ | $n$ | $\phi_0$ |
|-------------------------------------|----------|-----|----------|
| C-N-O-C <sub>A</sub>                | 15.0     | 2.0 | 180.0    |
| N-H <sub>N</sub> -C <sub>A</sub> -C | 30.0     | 2.0 | 180.0    |

Nonbonded parameters (repulsion function)<sup>1</sup>:  $V_{nb} = Ce^{-\alpha r}$

| Atom type                          | $C$  | $\alpha$ |
|------------------------------------|------|----------|
| O <sub>H</sub> -H <sub>i=1,2</sub> | 4000 | 4.0      |

Nonbonded parameters (van der Waals)<sup>2</sup>:  $V_{nb} = \epsilon^* \left[ \left( \frac{r^*}{r} \right)^{12} - 2 \left( \frac{r^*}{r} \right)^6 \right]$

| Atom type                        | $r^*$ | $\epsilon^*$ |
|----------------------------------|-------|--------------|
| O <sub>D1</sub> -O <sub>D2</sub> | 3.0   | 0.08         |
| H-H <sub>i=1,2,N,A</sub>         | 2.5   | 0.01         |

\*Energies are in kcal/mol, distances in Å and angles in degrees.

<sup>1</sup>Nonbonded interactions, where only the repulsion term is considered for atoms, which are bonded in one of the VB structures.

<sup>2</sup>Nonbonded interactions for atoms, which are never bonded in any of the VB structures.

**Table SII.** Parameters used for the calibration of the EVB surface of the uncatalyzed reaction in water and later in the protein to reproduce the experimental trend.

| Reaction Step           | $H_{ij}$ | $\Delta\alpha_{ij}$ |
|-------------------------|----------|---------------------|
| <i>RS</i> → <i>TSI</i>  | 20.0     | 43.0                |
| <i>TSI</i> → <i>Int</i> | 111.0    | 112.0               |

**Table SIII.** The calculated apparent pKa's of the basic and acidic groups obtained using pKa-PDLLD level of the MOLARIS program at dielectric constant  $\epsilon = 4.0$ .

| ionizable<br>group | calculated<br>apparent pKa |
|--------------------|----------------------------|
| ARG8               | 13.2                       |
| ARG8'              | 12.2                       |
| ASP29              | 4.6                        |
| ASP 29'            | 5.5                        |
| ASP30              | 5.4                        |
| ASP30'             | 5.3                        |
| ARG87              | 13.6                       |
| ARG87'             | 13.2                       |
| ASP25'             | 10.2                       |
